# Supplementary material for: Boosting of the enhanced permeability and retention effect with nanocapsules improves the therapeutic effects of cetuximab
Source: PubMed Central journal article supplement (PMC7309461; doi:10.20892/j.issn.2095-3941.2019.0292), 2020-05-15
Supplement: cbm-17-433-s001.pdf [file cbm-17-433-s001.pdf]

## Supplementary material

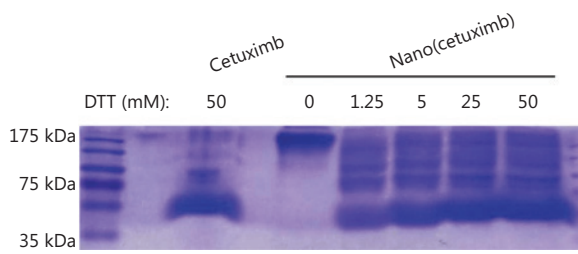

**Figure S1** Nano(cetuximab) was treated with dithiothreitol, and Coomassie Brilliant Blue staining was conducted after reducing polyacrylamide gel electrophoresis.
